# Supplementary material for: Orientia tsutsugamushi Infection in Wild Small Mammals in Western Yunnan Province, China
Source: MDPI journal article supplement (doi:10.3390/pathogens12010128), 2023-01-12
Supplement: s1 [file s1]

Table S1. *Ot* strains from Genbank used in this study

| Species of strain     | Source                    | No. Genbank | Geographic location | Time | DNA size(bp) |
|-----------------------|---------------------------|-------------|---------------------|------|--------------|
| <i>Karp</i>           | Human                     | M33004      | New Guinea          | 1943 | 1599         |
| <i>Taiwan Gilliam</i> | –                         | DQ485289    | China Taiwan        | 2006 | 1860         |
| <i>Kuioki</i>         | Human                     | M63380      | Japan               | 1981 | 1599         |
| <i>KM11-2</i>         | Human                     | GU446591    | China Taiwan        | 2010 | 1608         |
| <i>KG_ST27</i>        | Human                     | MG870317    | India               | 2018 | 558          |
| <i>NAN057</i>         | Human                     | MK660515    | Thailand            | 2019 | 468          |
| <i>OtMMC73</i>        | –                         | MK617204    | Bangladesh          | 2018 | 721          |
| <i>OTVi18</i>         | Human                     | KY635436    | India               | 2017 | 522          |
| <i>Sxh951</i>         | Human                     | AF050669    | China               | 1998 | 1544         |
| <i>OTSg62</i>         | Human                     | KF777346    | India               | 2013 | 315          |
| <i>DS3910C</i>        | Chiggers                  | MK660524    | Thailand            | 2019 | 495          |
| <i>Boryong</i>        | Human                     | L04956      | South Korea         | 1993 | 1874         |
| <i>OTE7</i>           | Human                     | KY635435    | India               | 2017 | 627          |
| <i>KM21-1</i>         | Chiggers                  | GU446605    | China Taiwan        | 2010 | 1575         |
| <i>CM606</i>          | Human                     | HM777460    | Thailand            | 2010 | 550          |
| <i>DS2641C</i>        | Chiggers                  | MK660519    | Thailand            | 2019 | 477          |
| <i>TT0711a</i>        | Human                     | GQ332755    | China Taiwan        | 2009 | 1551         |
| <i>YNHH65</i>         | <i>Eothenomys miletus</i> | KU664516    | China               | 2016 | 151          |

Figure S1. Phylogenetic tree based on *Ot* 56kDa gene fragment constructed by a maximum likelihood method.

Notes: ● Positive Samples of Lianghe; ■ Positive Samples of Jianchuan; ▲ Positive Samples of Yulong.

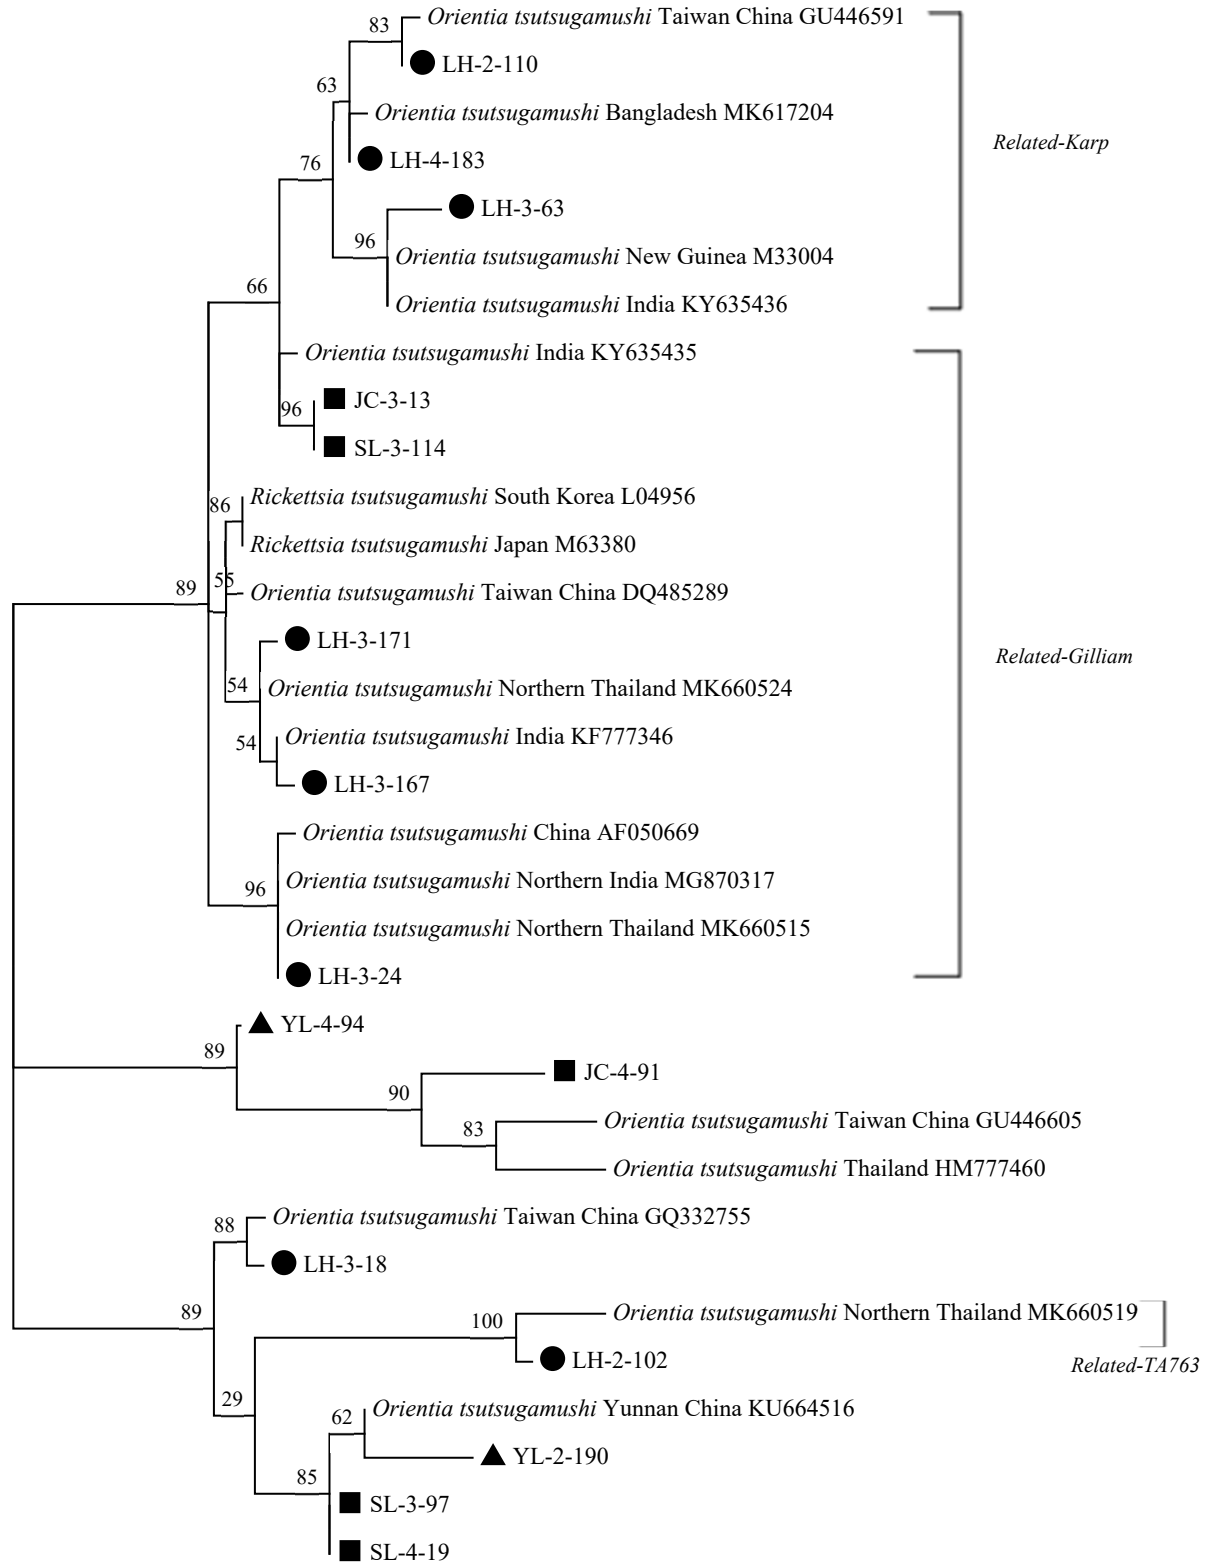

Table S2. *Ot* genotypes of the infected wild small mammals in western Yunnan Province

| County    | Small Mammals                | Positive Sample* | Genotype               |
|-----------|------------------------------|------------------|------------------------|
| Lianghe   | <i>Rattus sladeni</i>        | LH-2-89          | <i>related-Gilliam</i> |
| Lianghe   | <i>Hylomys suillus</i>       | LH-2-102         | <i>related-TA763</i>   |
| Lianghe   | <i>Rattus tanezumi</i>       | LH-2-107         | <i>related-Karp</i>    |
| Lianghe   | <i>Rattus tanezumi</i>       | LH-2-110         | <i>related-Karp</i>    |
| Lianghe   | <i>Rattus tanezumi</i>       | LH-3-002         | <i>related-Karp</i>    |
| Lianghe   | <i>Anourosorex squamipes</i> | LH-3-18          | <i>closer Kawasaki</i> |
| Lianghe   | <i>Rattus sladeni</i>        | LH-3-24          | <i>related-Gilliam</i> |
| Lianghe   | <i>Rattus sladeni</i>        | LH-3-63          | <i>related-Karp</i>    |
| Lianghe   | <i>Rattus sladeni</i>        | LH-3-100         | <i>related-Gilliam</i> |
| Lianghe   | <i>Rattus sladeni</i>        | LH-3-102         | <i>related-Gilliam</i> |
| Lianghe   | <i>Rattus sladeni</i>        | LH-3-108         | <i>related-Gilliam</i> |
| Lianghe   | <i>Suncus murinus</i>        | LH-3-162         | <i>closer Kawasaki</i> |
| Lianghe   | <i>Rattus sladeni</i>        | LH-3-167         | <i>related-Gilliam</i> |
| Lianghe   | <i>Rattus tanezumi</i>       | LH-3-171         | <i>related-Gilliam</i> |
| Lianghe   | <i>Rattus sladeni</i>        | LH-4-116         | <i>related-Gilliam</i> |
| Lianghe   | <i>Rattus sladeni</i>        | LH-4-134         | <i>related-Gilliam</i> |
| Lianghe   | <i>Niviventer fulvescens</i> | LH-4-139         | <i>related-Gilliam</i> |
| Lianghe   | <i>Rattus tanezumi</i>       | LH-4-183         | <i>related-Karp</i>    |
| Jianchuan | <i>Eothenomys miletus</i>    | SL-1-34          | <i>closer Kawasaki</i> |
| Jianchuan | <i>Crocidura attenuate</i>   | SL-3-56          | <i>closer Kawasaki</i> |
| Jianchuan | <i>Eothenomys miletus</i>    | SL-3-97          | <i>closer Kawasaki</i> |
| Jianchuan | <i>Eothenomys miletus</i>    | SL-3-114         | <i>related-Gilliam</i> |
| Jianchuan | <i>Eothenomys miletus</i>    | SL-3-115         | <i>closer Kawasaki</i> |
| Jianchuan | <i>Apodemus draco</i>        | SL-3-132         | <i>closer Karp</i>     |
| Jianchuan | <i>Eothenomys miletus</i>    | SL-4-006         | <i>closer Karp</i>     |
| Jianchuan | <i>Eothenomys miletus</i>    | SL-4-009         | <i>closer Kawasaki</i> |
| Jianchuan | <i>Eothenomys miletus</i>    | SL-4-18          | <i>closer Karp</i>     |
| Jianchuan | <i>Eothenomys miletus</i>    | SL-4-19          | <i>closer Kawasaki</i> |
| Jianchuan | <i>Eothenomys miletus</i>    | SL-4-26          | <i>related-Gilliam</i> |
| Jianchuan | <i>Eothenomys miletus</i>    | SL-4-47          | <i>closer Kawasaki</i> |

Table S2. *Ot* genotypes of the infected wild small mammals in western Yunnan Province (Continued).

| County    | Small Mammals                 | Positive Sample | Genotype               |
|-----------|-------------------------------|-----------------|------------------------|
| Jianchuan | <i>Eothenomys miletus</i>     | SL-4-106        | <i>closer Kawasaki</i> |
| Jianchuan | <i>Apodemus draco</i>         | JC-1-74         | <i>closer Kawasaki</i> |
| Jianchuan | <i>Apodemus chevrieri</i>     | JC-1-106        | <i>closer Kawasaki</i> |
| Jianchuan | <i>Eothenomys miletus</i>     | JC-2-43         | <i>related-Gilliam</i> |
| Jianchuan | <i>Eothenomys miletus</i>     | JC-2-45         | <i>related-Gilliam</i> |
| Jianchuan | <i>Eothenomys miletus</i>     | JC-2-78         | <i>closer Kawasaki</i> |
| Jianchuan | <i>Eothenomys miletus</i>     | JC-3-13         | <i>related-Gilliam</i> |
| Jianchuan | <i>Apodemus draco</i>         | JC-3-55         | <i>related-Gilliam</i> |
| Jianchuan | <i>Apodemus chevrieri</i>     | JC-3-66         | <i>closer Kawasaki</i> |
| Jianchuan | <i>Niviventer andersoni</i>   | JC-4-91         | <i>closer Karp</i>     |
| Yulong    | <i>Niviventer confucianus</i> | YL-2-190        | <i>closer Kawasaki</i> |
| Yulong    | <i>Apodemus draco</i>         | YL-3-288        | <i>closer Karp</i>     |
| Yulong    | <i>Apodemus draco</i>         | YL-4-94         | <i>closer Karp</i>     |
| Yulong    | <i>Apodemus draco</i>         | YL-4-102        | <i>closer Karp</i>     |
| Yulong    | <i>Apodemus latronum</i>      | YL-4-121        | <i>closer Karp</i>     |

\*Notes: LH: Lianghe county; JC and SL: Jianchuan county; YL: Yulong county.

1: Spring; 2: Summer; 3: Autumn; 4: Winter.
